# Supplementary material for: Development of Functional Antibodies Directed to Human Dialyzable Leukocyte Extract (Transferon®)
Source: Hindawi journal article supplement (doi:10.1155/2019/2754920), 2019-05-16

### Supplemental Figure 1

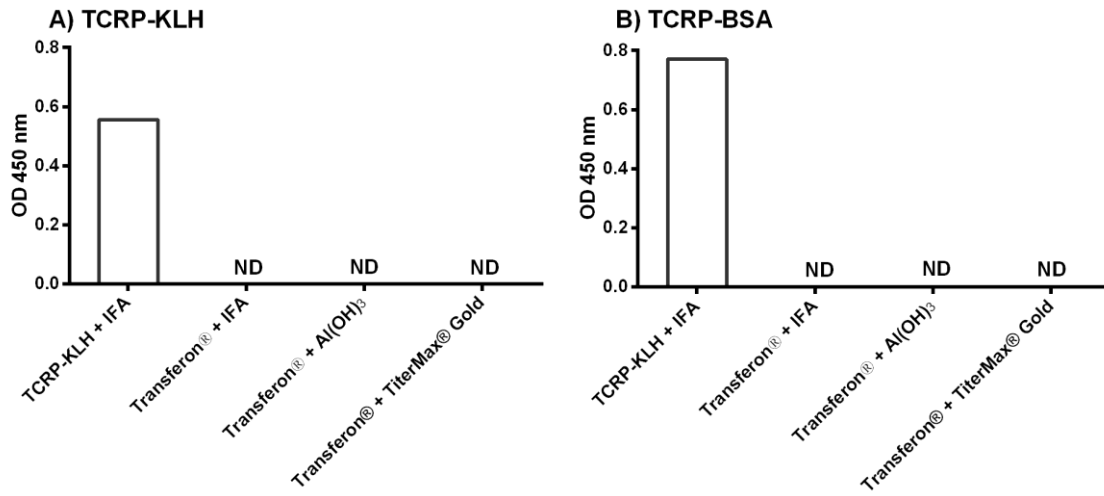

Supplement: f1 [file 2754920.f1.pdf]
